# Supplementary material
Source: MDPI journal article supplement (https://www.mdpi.com/2079-6412/8/10/365)
Supplement: s1 [file s1]

# Supplementary Materials

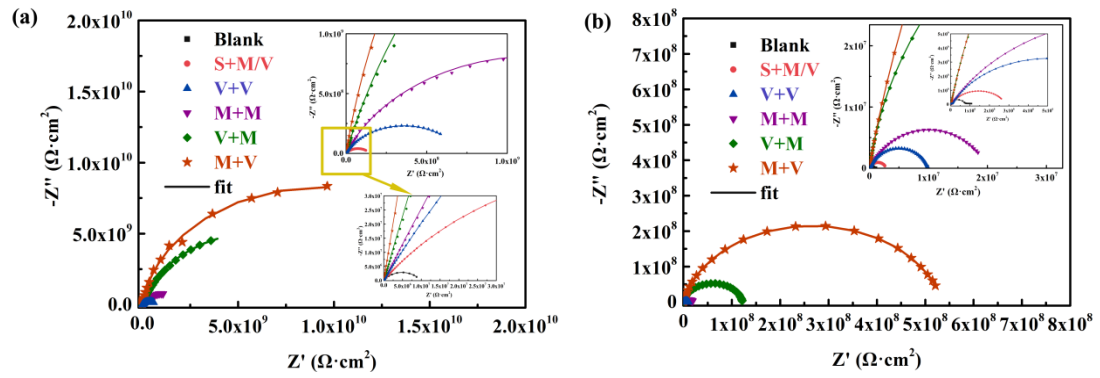

**Figure S1.** Nyquist plots of AA2024 coated with different coatings immersed in 3.5 wt.% NaCl solution for (a) 2 and (b) 10 days.
